# Supplementary material
Source: PubMed Central journal article supplement (PMC5915031)
Supplement: kcbt-19-05-1433496-s001.pdf [file kcbt-19-05-1433496-s001.pdf]

**A Results of HE and IHC**

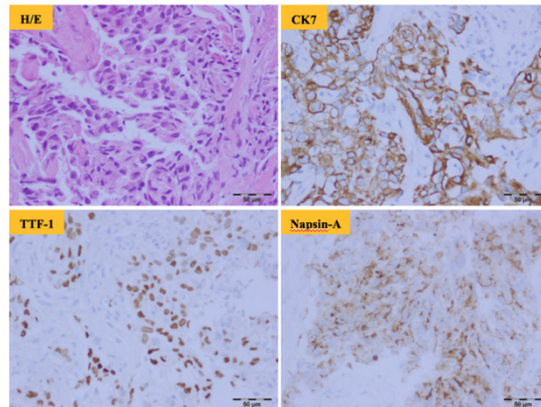

**B Effect of Crizotinib Therapy**

**Baseline**

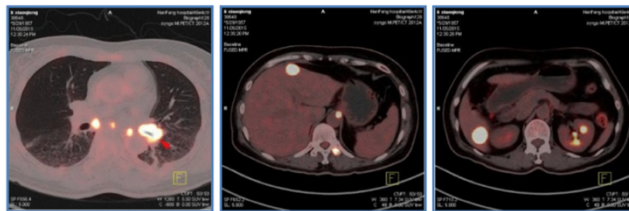

**Response to Crizotinib**

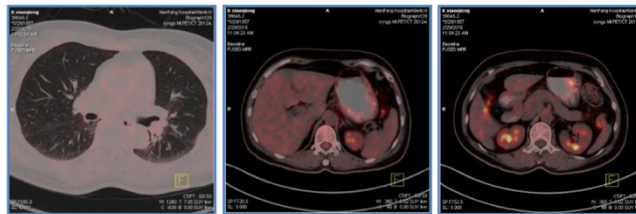

**Resistance to Crizotinib**

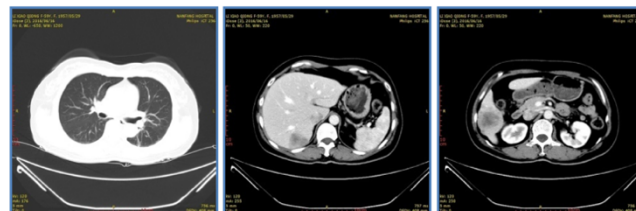

**Supplementary Figure 1.** Histopathological diagnosis of the patient and image evaluation before and after crizotinib treatment.

A. Hematoxylin and eosin(H/E) staining and immunostaining for the left lung biopsy tissue. IHC analysis revealed that the tumor cells were positive for cytokeratin 7 (CK7), napsin A, and thyroid transcription factor-1 (TTF-1). B. CT or PET-CT images of the patient’s primary pulmonary and metastatic liver lesions chronicling the response to treatment with crizotinib.

**A Effect of Ceritinib Therapy**

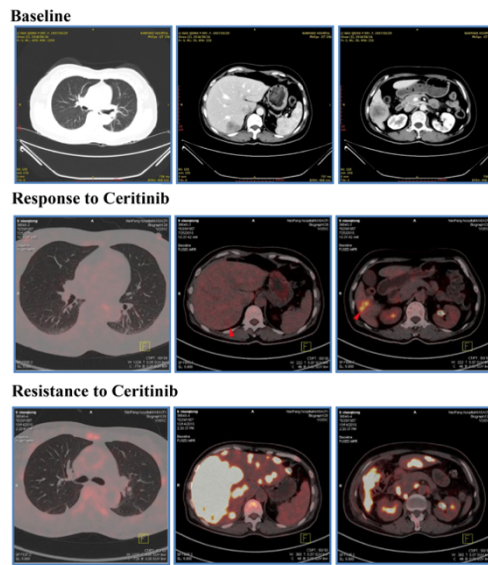

**B Effect of Lorlatinib combined with Crizotinib Therapy**

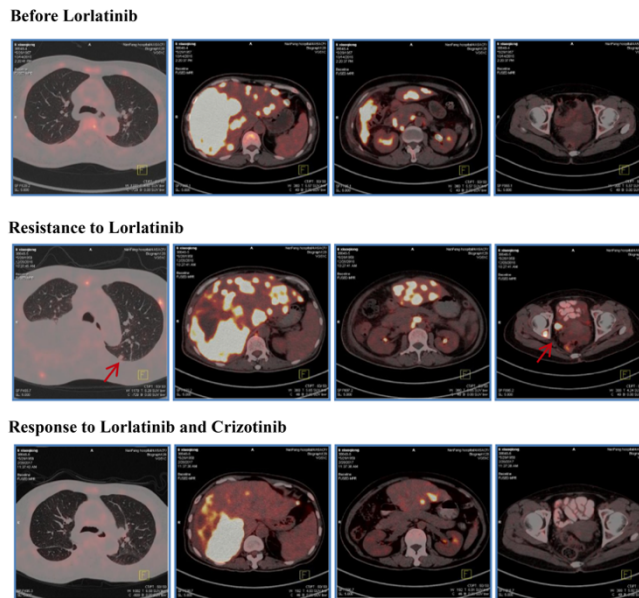

**Supplementary Figure 2.** Image evaluation before and after the ALK inhibitors treatment.

A. CT or PET-CT images of the patient's primary pulmonary and metastatic liver lesions chronicling the response to treatment with ceritinib. B. PET-CT images of the patient's primary pulmonary and metastatic liver, lymph node, and bone lesions chronicling the response to combination treatment of lorlatinib with crizotinib.
